# Supplementary material
Source: ML conference proceedings conference paper supplement (https://proceedings.neurips.cc/paper_files/paper/2022/hash/45542d647974ca6af58441c4817c9b5b-Abstract.html)
Supplement: Supplementary file 1 [file 45542d647974ca6af58441c4817c9b5b-Supplemental-Conference.zip]

Archive with 65 entries (59 files):
- materials/
- materials/.DS_Store
- __MACOSX/materials/._.DS_Store
- materials/Neurips_2022_Updated_Appendix.pdf
- __MACOSX/materials/._Neurips_2022_Updated_Appendix.pdf
- materials/Paper 8087 code/
- __MACOSX/materials/._Paper 8087 code
- materials/Paper 8087 code/.DS_Store
- __MACOSX/materials/Paper 8087 code/._.DS_Store
- materials/Paper 8087 code/run_cuda.py
- __MACOSX/materials/Paper 8087 code/._run_cuda.py
- materials/Paper 8087 code/optimization.py
- __MACOSX/materials/Paper 8087 code/._optimization.py
- materials/Paper 8087 code/distribution.py
- __MACOSX/materials/Paper 8087 code/._distribution.py
- materials/Paper 8087 code/readme.md
- __MACOSX/materials/Paper 8087 code/._readme.md
- materials/Paper 8087 code/getATE.py
- __MACOSX/materials/Paper 8087 code/._getATE.py
- materials/Paper 8087 code/utils.py
- __MACOSX/materials/Paper 8087 code/._utils.py
- materials/Paper 8087 code/model/
- __MACOSX/materials/Paper 8087 code/._model
- materials/Paper 8087 code/module.py
- __MACOSX/materials/Paper 8087 code/._module.py
- materials/Paper 8087 code/data/
- __MACOSX/materials/Paper 8087 code/._data
- materials/Paper 8087 code/model/.DS_Store
- __MACOSX/materials/Paper 8087 code/model/._.DS_Store
- materials/Paper 8087 code/data/tweet_data/
- __MACOSX/materials/Paper 8087 code/data/._tweet_data
- materials/Paper 8087 code/data/.DS_Store
- __MACOSX/materials/Paper 8087 code/data/._.DS_Store
- materials/Paper 8087 code/data/syn_data/
- __MACOSX/materials/Paper 8087 code/data/._syn_data
- materials/Paper 8087 code/data/syn_data/news_topic_features.feats
- __MACOSX/materials/Paper 8087 code/data/syn_data/._news_topic_features.feats
- materials/Paper 8087 code/data/syn_data/dataset.pkl
- __MACOSX/materials/Paper 8087 code/data/syn_data/._dataset.pkl
- materials/Paper 8087 code/data/syn_data/hawkes_model.model
- __MACOSX/materials/Paper 8087 code/data/syn_data/._hawkes_model.model
- materials/Paper 8087 code/data/syn_data/.DS_Store
- __MACOSX/materials/Paper 8087 code/data/syn_data/._.DS_Store
- materials/Paper 8087 code/data/syn_data/dataset_new.pkl
- __MACOSX/materials/Paper 8087 code/data/syn_data/._dataset_new.pkl
- materials/Paper 8087 code/data/syn_data/event_features.feats
- __MACOSX/materials/Paper 8087 code/data/syn_data/._event_features.feats
- materials/Paper 8087 code/data/syn_data/self_decay.feats
- __MACOSX/materials/Paper 8087 code/data/syn_data/._self_decay.feats
- materials/Paper 8087 code/data/syn_data/influence_personal.model
- __MACOSX/materials/Paper 8087 code/data/syn_data/._influence_personal.model
- materials/Paper 8087 code/data/syn_data/text_user.pkl
- __MACOSX/materials/Paper 8087 code/data/syn_data/._text_user.pkl
- materials/Paper 8087 code/data/syn_data/news_data.pkl
- __MACOSX/materials/Paper 8087 code/data/syn_data/._news_data.pkl
- materials/Paper 8087 code/data/syn_data/post_generator.model
- __MACOSX/materials/Paper 8087 code/data/syn_data/._post_generator.model
- materials/Paper 8087 code/data/syn_data/information_generator.model
- __MACOSX/materials/Paper 8087 code/data/syn_data/._information_generator.model
- materials/Paper 8087 code/data/syn_data/text_user_new.pkl
- __MACOSX/materials/Paper 8087 code/data/syn_data/._text_user_new.pkl
- materials/Paper 8087 code/data/syn_data/influence_inherent.feats
- __MACOSX/materials/Paper 8087 code/data/syn_data/._influence_inherent.feats
- materials/Paper 8087 code/data/syn_data/treatment_embedding.feats
- __MACOSX/materials/Paper 8087 code/data/syn_data/._treatment_embedding.feats
